# Supplementary material for: A Facile Method to In-Situ Synthesize Porous Ni2GeO4 Nano-Sheets on Nickel Foam as Advanced Anode Electrodes for Li-Ion Batteries
Source: MDPI journal article supplement (doi:10.3390/nano6110218), 2016-11-19

# Supporting Information: A Facile Method to In-Situ Synthesize Porous Ni<sub>2</sub>GeO<sub>4</sub> Nano-Sheets on Nickel Foam as Advanced Anode Electrodes for Li Ion Batteries

Delong Ma, Xiaomin Shi and Anming Hu

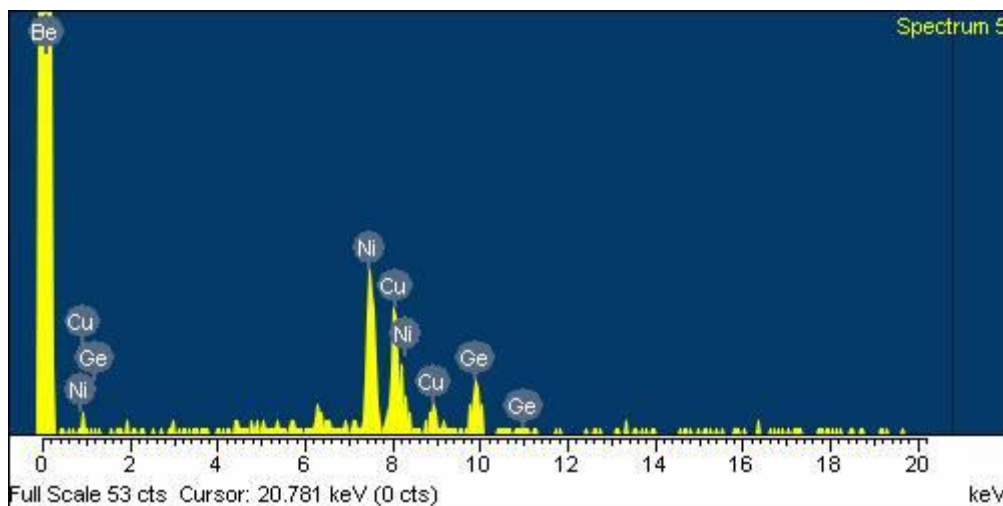

Figure S1. Energy dispersive X-ray spectroscopy (EDS) spectrum of the precursor.

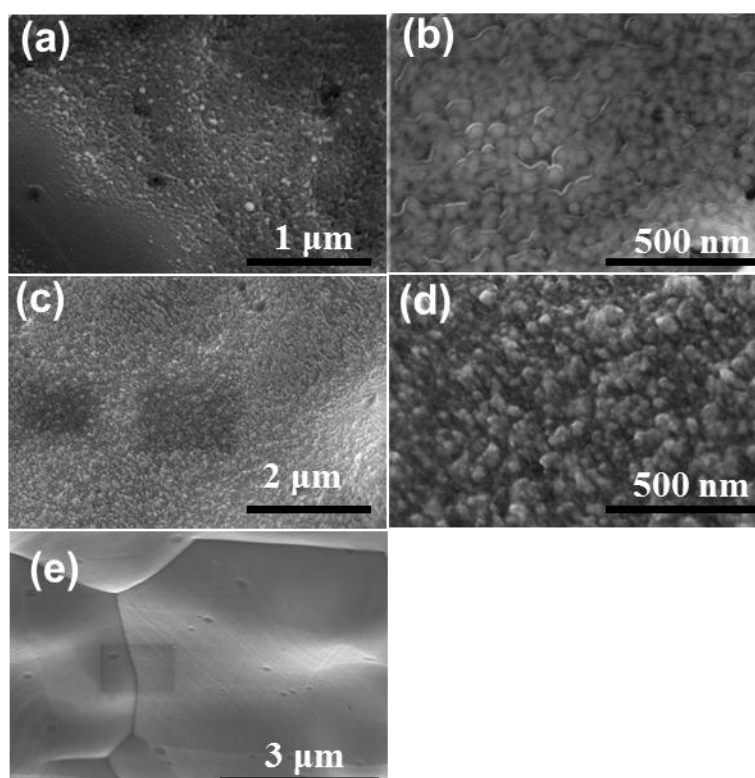

Figure S2. SEM images of as-prepared samples. (a,b) without controlling the pH, (c,d) without adding GeO<sub>2</sub>, (e) without adding NH<sub>4</sub>OH and GeO<sub>2</sub>.

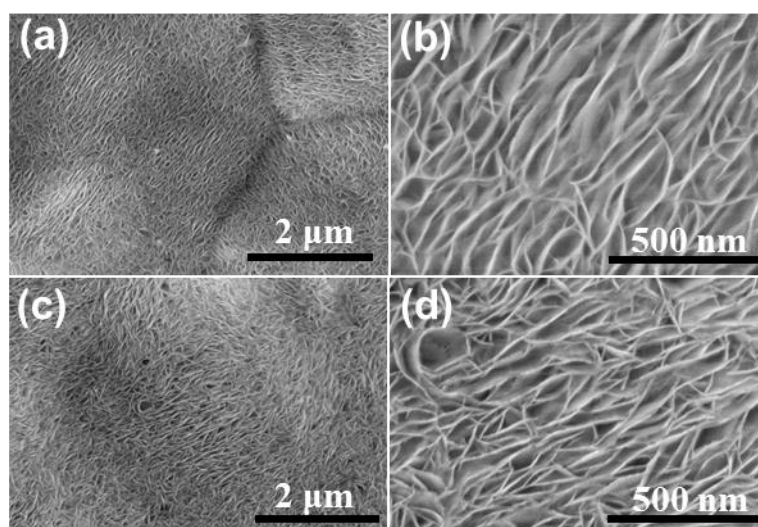

Figure S3. SEM images of as-prepared samples with different reaction time. (a,b) 3h and (c,d) 12 h.

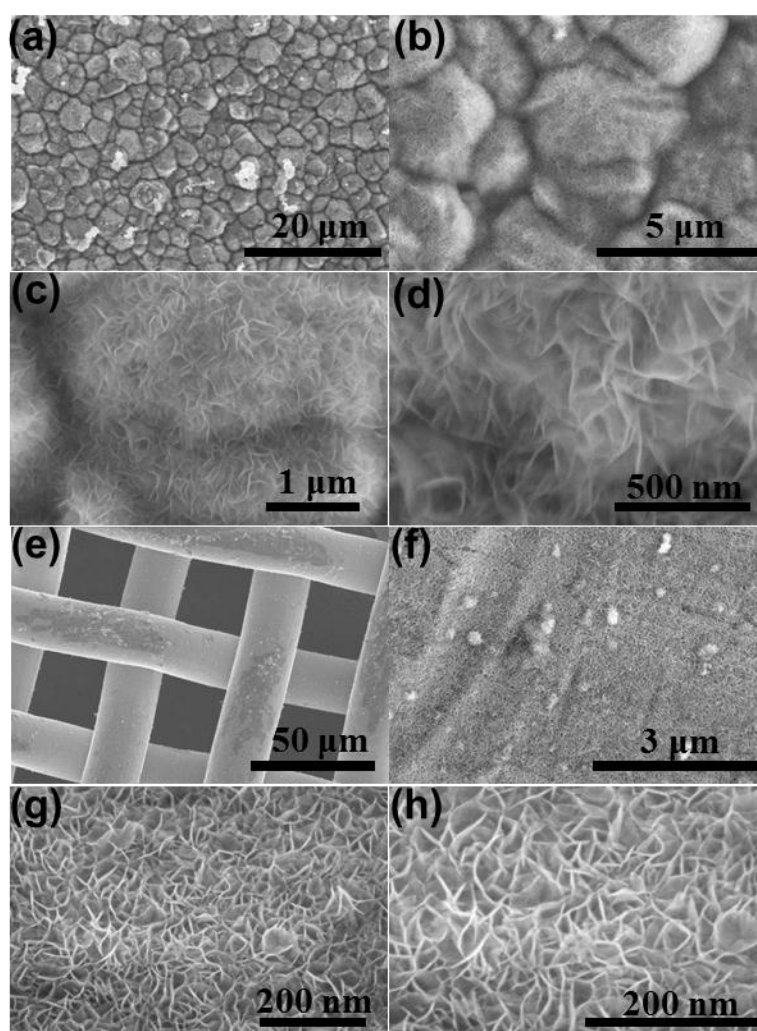

Figure S4. SEM images of as-prepared nano-sheet precursor at different conductive substrate. (a–d) on Cu foil and (e–h) on stainless steel wire.

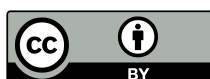

Supplement: s1 [file s1]
